# Supplementary material
Source: PubMed Central journal article supplement (PMC3009883)
Supplement: supp_M110.190504_jbc.M110.190504-1.pdf [file supp_M110.190504_jbc.M110.190504-1.pdf]

**SUPPLEMENTAL TABLE S1.** Primers used in this study.

| Primer function                     | Primer name | Direction                                                     | Sequence 5'→3'                                                | Restriction site |
|-------------------------------------|-------------|---------------------------------------------------------------|---------------------------------------------------------------|------------------|
| <i>ygfA</i> <i>E. coli</i> knockout | EcΔygfA     | F                                                             | GCGGGCCAGTCCCCTGA                                             |                  |
|                                     |             | R                                                             | AAGCCCTCACCGAAGCGAGG                                          |                  |
| Functional complementation          | EcKeioK1    | R                                                             | CAGTCATAGCCGAATAGCCT                                          |                  |
|                                     | EcKeioK2    | F                                                             | CGGTGCCCTGAATGAACTGC                                          |                  |
|                                     | AbFT        | F                                                             | CTAGTCTAGACTGAAGGAAAACAGCTATGCCCTCTACTCTTGTG                  | <i>XbaI</i>      |
|                                     |             | R                                                             | CTAGGGTACCTATTTTCAGTGGCGCCAC                                  | <i>KpnI</i>      |
|                                     | EmFT        | F                                                             | CTAGTCTAGACTGAAGGAAAACAGCTATGGCTATGATAGAATGCC                 | <i>XbaI</i>      |
|                                     |             | R                                                             | CTAGGGTACCTTATATTTTTTTTTGGAATAGTC                             | <i>KpnI</i>      |
|                                     | HaFT        | F                                                             | CTAGTCTAGACTGAAGGAAAACAGCTATGGGCTTGGTCGAAAG                   | <i>XbaI</i>      |
|                                     |             | R                                                             | CTAGGGTACCTAGAGTGTCTGTCAGTTTTG                                | <i>KpnI</i>      |
|                                     | SaFT        | F                                                             | CTAGTCTAGACTGAAGGAAAACAGCTATGAAAATCATCGAATGCC                 | <i>XbaI</i>      |
|                                     |             | R                                                             | CTAGGGTACCTTATTCGGCTTTCTTGAATG                                | <i>KpnI</i>      |
|                                     | SpFT        | F                                                             | CTAGTCTAGACTGAAGGAAAACAGCTATGGCGAAAATTGTTG                    | <i>XbaI</i>      |
|                                     |             | R                                                             | CTAGGGTACCTAACCTAGCAAATGGTTTTG                                | <i>KpnI</i>      |
|                                     | PtFT        | F                                                             | CTAGGAATTCCTGAAGGAAAACAGCTATGCCTGATAAAGAAGTTAAAATTGTTGAAGC    | <i>EcoRI</i>     |
|                                     |             | R                                                             | CTAGGGTACCTTATGTAATATCTTATATTCTAAAATCTTATCCCTTG               | <i>KpnI</i>      |
|                                     | TaFT        | F                                                             | CTAGTCTAGACTGAAGGAAAACAGCTATGTCTTGTGTAATGCGTACCCAAC           | <i>XbaI</i>      |
|                                     |             | R                                                             | CTAGGGTACCTTATTCATATTTGCTGCCTTCTCCATCTTG                      | <i>KpnI</i>      |
| EcYgfA                              | F           | CTAGTCTAGACTGAAGGAAAACAGCTATGACGCAACTACCAGAACTCCC             | <i>XbaI</i>                                                   |                  |
|                                     | R           | CTAGGGTACCTTACCCTCCAGACTTTTCGACG                              | <i>KpnI</i>                                                   |                  |
| Protein overexpression              | AbFT        | F                                                             | AGCTAGCATATGCCCTCTACTCTTGTGAATGTGTTCC                         | <i>NdeI</i>      |
|                                     |             | R                                                             | TCTAGCTGCGGCCGCTTTCAGTGCCGCCACCTTCTCGC                        | <i>NotI</i>      |
|                                     | SpFT        | F                                                             | CTAGCCATGGCGAAAATTGTTGAATGTATTCCAAC                           | <i>NcoI</i>      |
|                                     |             | R                                                             | GATCCTCGAGACCTAGCAAATGGTTTTCAAGAATCTGTTTATG                   | <i>XhoI</i>      |
|                                     | PtFT        | F                                                             | AGCTAGCATATGCCTGATAAAGAAGTTAAAATTGTTGAAGCCG                   | <i>NdeI</i>      |
|                                     |             | R                                                             | AGCTCTCGAGTGTAAATATCTTATATTCTAAAATCTTATCCCTTGTAAATATTTGATTTG  | <i>XhoI</i>      |
| TaFT                                | F           | AGCTAGCATATGTCTCTTGTGTAATGCGTACCCAACCTC                       | <i>NdeI</i>                                                   |                  |
|                                     | R           | AGCTCTCGAGTTCATATTTGCTGCCTTCTCCATCTTGC                        | <i>XhoI</i>                                                   |                  |
| <i>FT S. pyogenes</i> knockout      | KO-Sp       | F                                                             | <b>GTATGGGAGCAACCGATGTCTGC</b>                                |                  |
|                                     |             | R                                                             | <b>CGGTCTTCTAACATGACACCGATAGC</b>                             |                  |
|                                     | SpKOver     | F                                                             | <b>CTTCTCAGAAGGCCAAAATCAGGCTG</b>                             |                  |
|                                     |             | R                                                             | <b>GTAGTATTCAGCCACATCGATTAAGGC</b>                            |                  |
|                                     | QueD        | F                                                             | TGCGATTTCTTATGGGATGT                                          |                  |
|                                     |             | R                                                             | TCAATAATAAGTGATCCTATGA                                        |                  |
|                                     | SpOri23     | F                                                             | CTAGGGATCCCTGAGGAGGACAGCTCAGATGGCGAAAATTGTTGAATGTATTCCCAACTTC | <i>BamHI</i>     |
|                                     |             | R                                                             | CTAGGTCGACCTAACCTAGCAAATGGTTTTCAAGAATCTGTTTATTATAG-           | <i>SalI</i>      |
| M13                                 | F           | CGCCAGGGTTTTCCAGTCACGAC                                       |                                                               |                  |
|                                     | R           | TCACACAGGAAACAGCTATGAC                                        |                                                               |                  |
| SpOri23                             | F           | CTAGGGATCCCTGAGGAGGACAGCTCAGATGGCGAAAATTGTTGAATGTATTCCCAACTTC | <i>BamHI</i>                                                  |                  |
|                                     | R           | CTAGGTCGACCTAACCTAGCAAATGGTTTTCAAGAATCTGTTTATTATAG-           | <i>SalI</i>                                                   |                  |

**Ec**, *Escherichia coli*; **Ab**, Acidobacteria bacterium Ellin 345; **Em**, *Elusimicrobium minutum*; **Ha**, *Herpetosiphon aurantiacus*; **Sa**, *Syntrophus acidotrophicus*; **Sp**, *Streptococcus pyogenes*; **Pt**, *Picrophilus torridus*; **Ta**, *Thermoplasma acidophilum*. **Bold**, gene sequence; underlined, restriction site; *italics*: Shine-Dalgarno sequence.
